# Supplementary material for: Involvement of the Acyl-CoA binding domain containing 7 in the control of food intake and energy expenditure in mice
Source: eLife journal article supplement (doi:10.7554/elife.11742), 2016-02-15
Supplement: supp [file elife-11742-supp-v1.zip]

Archive with 27 entries (27 files):
- elife_poa_e11742_Figure_5_source_data_5.xlsx
- elife_poa_e11742_Figure_1_figure_supplement_1.pdf
- elife_poa_e11742_Figure_4_source_data_4.xlsx
- elife_poa_e11742_Figure_1_figure_supplement_2.pdf
- elife_poa_e11742_Figure_2_source_data_2.xlsx
- elife_poa_e11742_Figure_4_source_data_5.xlsx
- elife_poa_e11742_Figure_2_source_data_5.xlsx
- elife_poa_e11742_Figure_1_source_data_3.xlsx
- elife_poa_e11742_Figure_2_source_data_1.xlsx
- elife_poa_e11742_Figure_2_source_data_4.xlsx
- elife_poa_e11742_Figure_4_source_data_3.xlsx
- elife_poa_e11742_Figure_3_source_data_3.xlsx
- elife_poa_e11742_Figure_1_source_data_1.xlsx
- elife_poa_e11742_Figure_3_source_data_1.xlsx
- elife_poa_e11742_Figure_5_source_data_1.xlsx
- elife_poa_e11742_Figure_1_figure_supplement_3.pdf
- elife_poa_e11742_Figure_1_source_data_6.xlsx
- elife_poa_e11742_Figure_3_source_data_2.xlsx
- elife_poa_e11742_Figure_4_source_data_2.xlsx
- elife_poa_e11742_Figure_5_source_data_2.xlsx
- elife_poa_e11742_Figure_1_source_data_2.xlsx
- elife_poa_e11742_Figure_2_source_data_3.xlsx
- elife_poa_e11742_Figure_4_source_data_1.xlsx
- elife_poa_e11742_Figure_1_source_data_4.xlsx
- elife_poa_e11742_Figure_5_source_data_4.xlsx
- elife_poa_e11742_Figure_5_source_data_3.xlsx
- elife_poa_e11742_Figure_1_source_data_5.xlsx
