# Supplementary material for: Involvement of the Acyl-CoA binding domain containing 7 in the control of food intake and energy expenditure in mice
Source: eLife journal article supplement (doi:10.7554/elife.11742), 2016-02-15
Supplement: supp [file elife-11742-supp-v1.zip › elife_poa_e11742_Figure_1_figure_supplement_2.pdf]

Figure 1 – Figure supplement 2

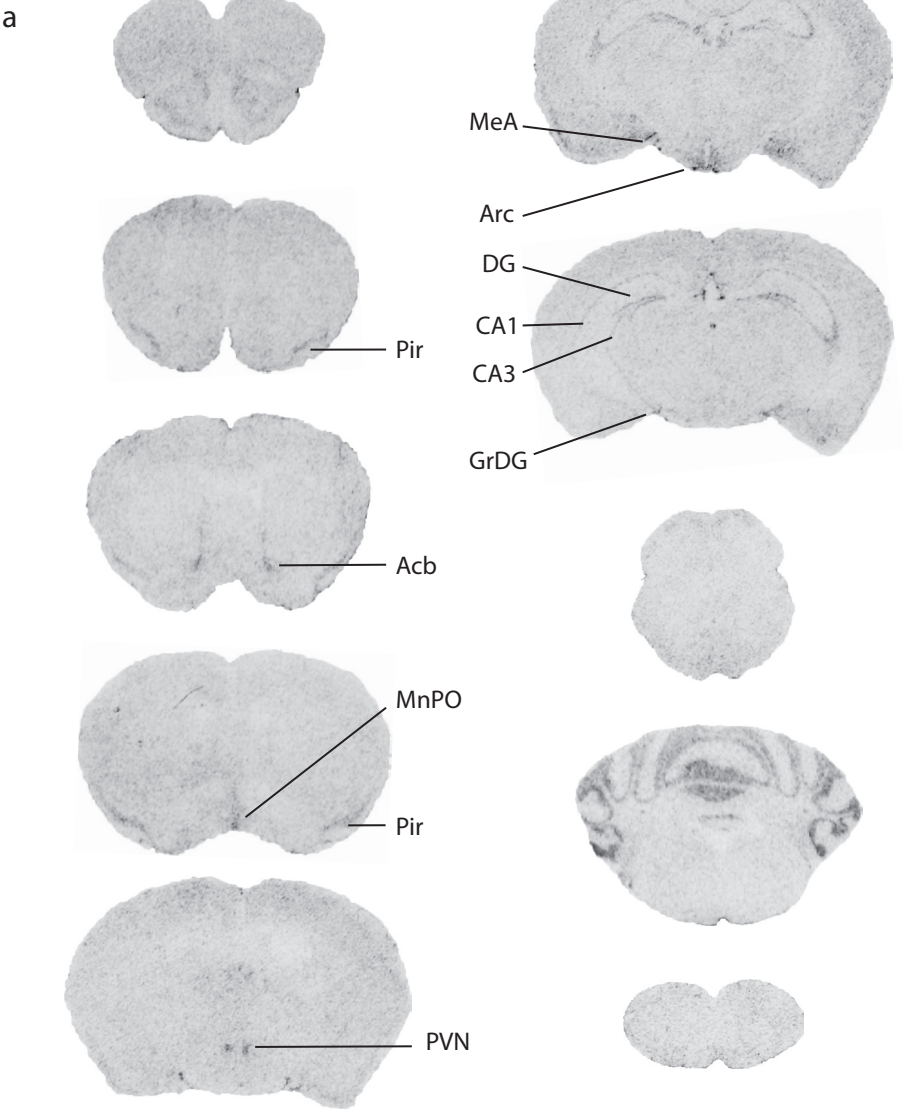

b

| Brain structures                   | Relative Acbd7 mRNA levels |
|------------------------------------|----------------------------|
| Piriform cortex                    | +                          |
| Nucleus accumbens                  | ++                         |
| Median preoptic nucleus            | ++                         |
| Paraventricular nucleus            | +++                        |
| Supraoptic nucleus                 | ++                         |
| Medial amygdala                    | +++                        |
| Arcuate nucleus                    | +++                        |
| Granular layer of the dental gyrus | ++                         |
| CA1 field                          | +                          |
| CA3 field                          | +                          |
| Dental gyrus                       | +                          |
