# Supplementary material for: Involvement of the Acyl-CoA binding domain containing 7 in the control of food intake and energy expenditure in mice
Source: eLife journal article supplement (doi:10.7554/elife.11742), 2016-02-15
Supplement: supp [file elife-11742-supp-v1.zip › elife_poa_e11742_Figure_1_source_data_1.xlsx]

## Sheet: NDN profil
FileName	PeptideModifiedSequence	PrecursorCharge	ProductMz	FragmentIon	ProductCharge	IsotopeLabelType	TotalArea	Intensities
peptide_CAM_Lanfray_CEopt_01.wiff	QSVIGDINIGAC[+57.0]PAMLDLK	3	900,4733	y17	2	light	1338793	0	0	0	33	50	0	33	0	0	0	33	0	0	0	0	0	0	0	0	17	0	0	17	0	0	133	0	0	0	0	0	17	0	0	0	0	0	0	0	83	0	0
peptide_CAM_Lanfray_CEopt_01.wiff	QSVIGDINIGAC[+57.0]PAMLDLK	3	850,9391	y16	2	light	185120,6	0	0	0	0	0	0	0	0	0	0	0	0	0	17	0	0	0	0	0	0	0	0	0	0	33	0	0	0	0	33	0	0	0	0	0	0	0	0	0	17	0	0
peptide_CAM_Lanfray_CEopt_01.wiff	QSVIGDINIGAC[+57.0]PAMLDLK	3	794,3971	y15	2	light	825309,3	0	17	0	0	0	50	0	17	0	0	0	0	0	0	0	0	0	0	0	17	33	0	0	0	17	0	0	0	0	0	17	0	0	0	0	0	33	0	0	0	0	0
peptide_CAM_Lanfray_CEopt_01.wiff	QSVIGDINIGAC[+57.0]PAMLDLK	3	394,2227	y7	2	light	1,126165E+07	0	0	0	100	0	67	0	0	0	0	0	0	0	0	0	0	0	0	0	0	33	17	0	0	0	0	0	17	100	17	0	0	0	50	0	0	0	0	117	0	0	0
								Times
								0	0,08343333	0,1668667	0,2503	0,33375	0,4171833	0,5006167	0,5840667	0,6675	0,7509333	0,8343667	0,9178166	1,00125	1,084683	1,168133	1,251567	1,335	1,41845	1,501883	1,585317	1,66875	1,7522	1,835633	1,919067	2,002517	2,08595	2,169383	2,252833	2,336267	2,4197	2,503133	2,586583	2,670017	2,75345	2,8369	2,920333	3,003767	3,087217	3,17065	3,254083	3,337517	3,420967
[truncated: 258 more columns]
