# Supplementary material for: Involvement of the Acyl-CoA binding domain containing 7 in the control of food intake and energy expenditure in mice
Source: eLife journal article supplement (doi:10.7554/elife.11742), 2016-02-15
Supplement: supp [file elife-11742-supp-v1.zip › elife_poa_e11742_Figure_1_source_data_2.xlsx]

## Sheet: NDN hypothalamic profil
FileName	PeptideModifiedSequence	PrecursorCharge	ProductMz	FragmentIon	ProductCharge	IsotopeLabelType	TotalArea	Intensities
Lanfray_hypothalamus.wiff	QSVIGDINIGAC[+57.0]PAMLDLK	3	900,4733	y17	2	light	235937	0	0	0	0	0	0	42	0	17	0	0	0	8	0	25	8	0	0	0	0	0	0	0	0	0	0	17	0	0	0	0	0	0	0	0	0	0	0	0	0	0	0
Lanfray_hypothalamus.wiff	QSVIGDINIGAC[+57.0]PAMLDLK	3	850,9391	y16	2	light	344053,9	0	0	75	17	0	0	8	0	0	0	0	0	0	0	0	0	17	0	0	33	0	17	0	0	0	8	8	0	0	0	0	0	8	0	0	0	42	0	8	0	8	0
Lanfray_hypothalamus.wiff	QSVIGDINIGAC[+57.0]PAMLDLK	3	794,3971	y15	2	light	407862,8	17	0	8	0	0	0	0	0	0	0	0	0	0	0	0	8	42	8	0	0	8	0	8	0	0	0	0	0	8	0	8	0	0	0	33	0	0	0	0	0	0	0
Lanfray_hypothalamus.wiff	QSVIGDINIGAC[+57.0]PAMLDLK	3	394,2227	y7	2	light	313672,4	17	0	0	0	8	0	0	0	0	0	0	0	0	0	0	0	8	0	0	0	17	25	25	0	0	0	0	0	0	0	0	0	0	0	0	0	0	0	0	0	25	8
								Times
								0	0,01458333	0,02916667	0,04375	0,05833333	0,07291666	0,0875	0,1020833	0,1166667	0,1312667	0,14585	0,1604333	0,1750167	0,1896	0,2041833	0,2187667	0,23335	0,24795	0,2625333	0,2771167	0,2917	0,3062833	0,3208667	0,33545	0,3500333	0,3646167	0,3792167	0,3938	0,4083833	0,4229667	0,43755	0,4521333	0,4667167	0,4813	0,4959	0,5104833	0,5250667	0,53965	0,5542333	0,5688167	0,5834	0,5979834
[truncated: 1,675 more columns]
