# Supplementary material for: Involvement of the Acyl-CoA binding domain containing 7 in the control of food intake and energy expenditure in mice
Source: eLife journal article supplement (doi:10.7554/elife.11742), 2016-02-15
Supplement: supp [file elife-11742-supp-v1.zip › elife_poa_e11742_Figure_1_source_data_3.xlsx]

## Sheet: Feuil1
		Ad libitum	Fasted	Refed
	Optical density	8.15212	4.96568	10.445
		9.274	7.03514	11.7453
		12.1618	3.13008	10.4834
		10.6206	3.39967	17.1537
		10.5136	6.80018	16.5734
		12.8266	5.52428	9.94086
		16.2908	4.74968	11.2042
		11.8151	4.68959	3.08808
	One-way ANOVA followed by a Bonferroni posttest
			p value	Summary
	Ad Libitum vs. Fasted		p = 0.0007	***
	Ad Libitum vs. Refed		p > 0.05	ns
