# Supplementary material for: Involvement of the Acyl-CoA binding domain containing 7 in the control of food intake and energy expenditure in mice
Source: eLife journal article supplement (doi:10.7554/elife.11742), 2016-02-15
Supplement: supp [file elife-11742-supp-v1.zip › elife_poa_e11742_Figure_1_source_data_4.xlsx]

## Sheet: Feuil1
		Ad libitum	Fasted	Refed
	Optical density	3.93477	4.2619	5.35644
		4.70099	1.96203	3.25989
		4.88042	3.08108	2.93022
		4.26944	3.81844	3.93582
		2.42688	4.42782	7.41493
		4.37879	4.91493	7.76227
		3.69311	5.01301	3.03894
			6.69981	3.2022
	One-way ANOVA followed by a Bonferroni posttest
			p value	Summary
	Ad Libitum vs. Fasted		p>0.9999	ns
	Ad Libitum vs. Refed		p=0.9473	ns
