# Supplementary material for: Involvement of the Acyl-CoA binding domain containing 7 in the control of food intake and energy expenditure in mice
Source: eLife journal article supplement (doi:10.7554/elife.11742), 2016-02-15
Supplement: supp [file elife-11742-supp-v1.zip › elife_poa_e11742_Figure_1_source_data_6.xlsx]

## Sheet: Feuil1
		Fasted	Refed
	Relative NDN peptide level	0.87	1.85
		1.05	1.73
		1.1	2.25
		0.98	1.33
	Unpaired Student's t test
	p value	Summary
	0.0068	**
