# Supplementary material for: Involvement of the Acyl-CoA binding domain containing 7 in the control of food intake and energy expenditure in mice
Source: eLife journal article supplement (doi:10.7554/elife.11742), 2016-02-15
Supplement: supp [file elife-11742-supp-v1.zip › elife_poa_e11742_Figure_2_source_data_1.xlsx]

## Sheet: Feuil1
	Time (h)	0.5	1	2	3	5		2 way ANOVA analysis folowed by Bonferroni posttests
	aCSF	0.7	0.8	1.1	1.2	1.6				Time (h)	P value	Summary
		0.8	0.9	1.1	1.5	2.1	aCSF vs. NDN (0.1ng)			0,5	P > 0.05	ns
		0.6	0.8	0.8	1.4	1.6				1	P > 0.05	ns
		0.7	0.7	0.9	1	1.2				2	P > 0.05	ns
		0.6	0.7	1	1.5	1.9				3	P > 0.05	ns
		0.6	0.7	0.9	1	1.2				5	P > 0.05	ns
	NDN (0.1ng)	0.6	0.6	0.7	0.8	1.1	aCSF vs. NDN (1ng)			0,5	p = 0.0156	*
		0.5	0.7	0.9	0.9	1.1				1	p = 0.097	**
		0.3	0.5	0.6	0.8	1.5				2	p = 0.0022	**
		0.4	0.5	0.7	0.8	1.1				3	p < 0.0001	***
		0.5	0.7	0.9	1.1	1.4				5	p = 0.0013	**
		0.4	0.5	0.7	1	1.3	aCSF vs. NDN (10ng)			0,5	p = 0.0004	***
	NDN (1ng)	0.4	0.4	0.5	0.6	1.4				1	p < 0.0001	***
		0.5	0.5	0.5	0.5	1.5				2	p < 0.0001	***
		0	0.4	0.6	0.8	1				3	p < 0.0001	***
		0.2	0.2	0.4	0.7	0.9				5	p < 0.0001	***
		0.3	0.3	0.6	0.8	1.1	aCSF vs. NDN (100ng)			0,5	p = 0.0386	*
		0	0.1	0.2	0.5	0.6				1	p = 0.0386	*
	NDN (10ng)	0.2	0.2	0.5	0.6	1				2	p = 0.0594	ns
		0.3	0.3	0.5	0.7	0.7				3	p = 0.0003	***
		0	0.1	0.2	0.5	1				5	p = 0.0022	**
		0.2	0.2	0.2	0.8	1.1	aCSF vs. NDN (1000ng)			0,5	P > 0.05	ns
		0	0.1	0.1	0.2	0.2				1	P > 0.05	ns
		0	0	0	0.3	0.3				2	p = 0.0022	**
	NDN (100ng)	0.3	0.3	0.8	1	1.9				3	p < 0.0001	***
		0.4	0.4	0.5	0.5	1.2				5	p < 0.0001	***
		0.4	0.5	0.5	0.9	1.6
		0.3	0.3	0.4	0.5	0.6
		0.2	0.3	0.5	0.5	0.5
		0	0.4	0.8	0.8	0.8
	NDN (1000ng)	0.4	0.4	0.4	0.7	0.8
		0.5	0.5	0.5	0.8	0.9
		0.6	0.6	0.6	0.7	1.1
		0.5	0.6	0.6	0.5	0.5
		0.2	0.2	0.2	0.4	0.4
		0.3	0.4	0.5	0.8	0.9
