# Supplementary material for: Involvement of the Acyl-CoA binding domain containing 7 in the control of food intake and energy expenditure in mice
Source: eLife journal article supplement (doi:10.7554/elife.11742), 2016-02-15
Supplement: supp [file elife-11742-supp-v1.zip › elife_poa_e11742_Figure_2_source_data_2.xlsx]

## Sheet: Feuil1
	Time (h)	0.5	1	2	3	5	2-way ANOVA analysis followed by Bonferroni posttests
	aCSF	0	0.1	0.5	0.7	1.4				Time (h)	P value	Summary
		0.9	0.9	0.9	0.9	0.9	aCSF vs. ACBD788(34-51) (10ng)			0,5	P = 0.4707	ns
		0.5	0.9	0.9	1.2	1.5				1	P = 0.1127	ns
		0.6	0.8	0.9	1.1	1.6				2	P = 0.0599	ns
		0.3	0.7	0.8	1.1	1.4				3	P = 0.2728	ns
		0.4	0.6	0.6	0.7	1				5	P = 0.2049	ns
	ACBD788(34-51) (10ng)	0	0.1	0.2	0.4	0.9	aCSF vs. ACBD788(34-51) (100ng)			0,5	p = 0.2049	ns
		0	0	0	0	0				1	p = 0.0051	**
		0.3	0.9	0.9	1.2	1.6				2	p = 0.0051	**
		0	0	0	0.6	0.9				3	p = 0.0011	**
		0.2	0.3	0.4	0.6	1				5	p < 0.0001	***
		0.2	0.2	0.4	0.7	1.1	aCSF vs. ACBD788(34-51) (1000ng)			0,5	p > 0.05	ns
	ACBD788(34-51) (100ng)	0	0	0	0	0				1	p > 0.05	ns
		0	0.1	0.1	0.1	0.7				2	p > 0.05	ns
		0	0	0.4	0.4	0.7				3	p > 0.05	ns
		0.2	0.2	0.2	0.3	0.4				5	p > 0.05	ns
		0.2	0.3	0.5	0.6	0.9
		0	0	0	0.5	0.7
	ACBD788(34-51) (1000ng)	0.3	0.4	0.5	0.5	0.5
		0.3	0.4	0.4	0.6	1
		0.3	0.5	0.7	0.7	1.3
		0.3	0.5	0.5	0.6	1.1
		0.2	0.4	0.4	0.6	1
		0.5	0.5	0.8	1.1	1.2
