# Supplementary material for: Involvement of the Acyl-CoA binding domain containing 7 in the control of food intake and energy expenditure in mice
Source: eLife journal article supplement (doi:10.7554/elife.11742), 2016-02-15
Supplement: supp [file elife-11742-supp-v1.zip › elife_poa_e11742_Figure_2_source_data_3.xlsx]

## Sheet: Feuil1
	Time (h)	0.5	1	2	3	5	24	2-way ANOVA analysis followed by Bonferroni posttests
	aCSF	0.2	0.3	0.6	1.2	1.5	3.3				Time (h)	P value	Summary
		0.2	0.4	0.7	0.9	0.9	2.3	aCSF vs. NDN12-19 (0.05ng)			0,5	P > 0.05	ns
		0.2	0.5	0.7	0.9	1.1	5.6				1	P > 0.05	ns
		0.3	0.4	0.7	1.1	1.1	2.5				2	P > 0.05	ns
		0.2	0.3	0.7	1	1.2	3.5				3	P = 0.0044	**
		0.1	0.3	0.8	1	1.2	2.4				5	P = 0.0026	**
	NDN12-19 (0.05ng)	0	0	0.8	0.8	1	3.2				24	P > 0.05	ns
		0.6	0.6	0.8	0.8	0.9	3.7	aCSF vs. NDN12-19 (0.5ng)			0,5	P > 0.05	ns
		0.1	0.3	0.5	0.6	0.8	2.5				1	P = 0.0476	*
		0.1	0.1	0.1	0.5	0.7	3.6				2	p = 0.0003	***
		0.2	0.3	0.4	0.6	0.7	2.8				3	p < 0.0001	***
		0	0	0.3	0.8	0.8	2.3				5	p < 0.0001	***
	NDN12-19 (0.5ng)	0.2	0.2	0.2	0.7	0.7	2.6				24	P > 0.05	ns
		0	0	0.1	0.1	0.2	5.4	aCSF vs. NDN12-19 (5ng)			0,5	p > 0.05	ns
		0	0.1	0.2	0.2	0.2	3.1				1	p =0.0151	*
		0.1	0.1	0.3	0.4	0.4	2.4				2	p < 0.0001	***
		0.1	0.2	0.4	0.5	0.5	2.6				3	p < 0.0001	***
		0.1	0.1	0.5	0.7	0.9	3.6				5	p < 0.0001	***
	NDN12-19 (5ng)	0	0	0	0	0	2.6				24	P > 0.05	ns
		0	0	0.1	0.4	0.8	5.2
		0.1	0.1	0.3	0.4	0.7	2.7
		0	0	0	0.2	0.2	2.2
		0.1	0.2	0.2	0.3	0.3	4
