# Supplementary material for: Involvement of the Acyl-CoA binding domain containing 7 in the control of food intake and energy expenditure in mice
Source: eLife journal article supplement (doi:10.7554/elife.11742), 2016-02-15
Supplement: supp [file elife-11742-supp-v1.zip › elife_poa_e11742_Figure_2_source_data_4.xlsx]

## Sheet: Feuil1
		aCSF	NDN (10ng)			aCSF	NDN (10ng)
	AUC (kJ.kg-1)	8343.59	8970.06		RQ (VCO2/VO2)	0.696458	0.697708
		8511.91	8586.37			0.6845	0.685542
		8265.11	10355.6			0.693542	0.711458
		9308.56	11712.5			0.6925	0.687417
		8110.06	10547.5			0.675	0.720625
		8299.57	8891.2			0.687792	0.674042
		7684.96	9722.34			0.685375	0.746667
		8978.73	9898.57			0.663625	0.687542
		aCSF	NDN (10ng)			aCSF	NDN (10ng)
	VO2 (ml.kg-1.min-1)	37.0012	40.1247		Physical activity (motions.h-1)	394.833	278.792
		37.2513	36.6703			265.083	191.375
		36.3956	45.0227			333.042	449
		40.0419	49.2433			341.375	76.375
		34.138	44.728			246.958	339.125
		35.7834	37.8188			235.5	348.833
		32.2258	40.7718			277.667	213.542
		37.0052	40.7881			195.625	157.833
		aCSF	NDN (10ng)		Unpaired Student's t test
	VCO2 (ml.kg-1.min-1)	26.4333	28.6646			p value	Summary
		25.9281	25.3767		AUC	p = 0.0047	**
		25.7327	32.6157		VO2	p = 0.0045	**
		28.0345	33.8609		VCO2	p = 0.0034	**
		23.1705	32.2725		RQ	p > 0.05	ns
		24.6784	25.6283		Physical activity	p > 0.05	ns
		22.1303	30.424
		25.5899	29.1526
