# Supplementary material for: Involvement of the Acyl-CoA binding domain containing 7 in the control of food intake and energy expenditure in mice
Source: eLife journal article supplement (doi:10.7554/elife.11742), 2016-02-15
Supplement: supp [file elife-11742-supp-v1.zip › elife_poa_e11742_Figure_2_source_data_5.xlsx]

## Sheet: Feuil1
		aCSF	NDN (10ng)
	Ucp-1/Arbp mRNA levels	59.672	140.536
		87.3281	200.234		Unpaired Student's t test
		126.168	156.628			p value	Summary
		108.115	271.105		Ucp1/Arbp mRNA levels	p = 0.0005	***
		92.2392	174.128
		103.106	278.978
		123.372	210.768
