# Supplementary material for: Involvement of the Acyl-CoA binding domain containing 7 in the control of food intake and energy expenditure in mice
Source: eLife journal article supplement (doi:10.7554/elife.11742), 2016-02-15
Supplement: supp [file elife-11742-supp-v1.zip › elife_poa_e11742_Figure_3_source_data_1.xlsx]

## Sheet: Feuil1
	Time (h)	0.5	1	2	3	5
	aCSF	0.4	0.8	1	1.5	1.9	2-way ANOVA analysis followed by Bonferroni posttests
		0.5	0.7	0.7	0.9	1.1				Time (h)	P value	Summary
		0.4	0.6	0.9	1	1.1	aCSF vs. NDN (10ng)			0,5	P = 0.0654	ns
		0.3	0.5	0.8	1	1.3				1	P = 0.0014	**
		0.2	0.4	0.5	0.8	0.9				2	p < 0.0001	***
		0.5	0.6	0.8	0.9	1				3	p < 0.0001	***
	NDN (10ng)	0	0	0	0.1	0.1				5	p < 0.0001	***
		0.2	0.3	0.4	0.5	0.6	aCSF vs.Flumazenil (2mg/kg)			0,5	p > 0.05	ns
		0.2	0.3	0.5	0.5	0.8				1	p > 0.05	ns
		0	0.1	0.2	0.2	0.3				2	p > 0.05	ns
		0	0	0	0	0.1				3	p > 0.05	ns
		0.1	0.1	0.1	0.2	0.5				5	p > 0.05	ns
	Flumazenil (2mg/kg)	0.7	1.1	1.2	1.7	1.8	aCSF vs. NDN (10ng) + Flumazenil (2mg/kg)			0,5	p = 0.0901	ns
		0.3	0.4	0.7	0.8	1.1				1	p = 0.0021	**
		0.3	0.5	0.8	0.8	1				2	p < 0.0001	***
		0.3	0.4	0.6	0.8	1				3	p < 0.0002	***
		0.2	0.4	0.5	0.6	0.8				5	p < 0.0003	***
		0.2	0.5	0.7	0.9	1
	NDN (10ng) + Flumazenil (2mg/kg)	0.2	0.2	0.2	0.3	0.3
		0.1	0.3	0.5	0.5	0.5
		0.2	0.2	0.2	0.3	0.5
		0	0.1	0.1	0.1	0.1
		0.1	0.1	0.1	0.1	0.2
		0	0	0.1	0.1	0.1
