# Supplementary material for: Involvement of the Acyl-CoA binding domain containing 7 in the control of food intake and energy expenditure in mice
Source: eLife journal article supplement (doi:10.7554/elife.11742), 2016-02-15
Supplement: supp [file elife-11742-supp-v1.zip › elife_poa_e11742_Figure_3_source_data_3.xlsx]

## Sheet: Feuil1
	Time (h)	0.5	1	2	3	5
	aCSF	0.4	0.5	0.9	1.2	1.7	2-way ANOVA analysis followed by Bonferroni posttests
		0.2	0.2	0.7	0.9	1				Time (h)	P value	Summary
		0.2	0.7	0.7	1	1.4	aCSF vs. NDN (10ng)			0,5	P = 0.0624	ns
		0.2	0.3	0.7	0.9	1.2				1	P = 0.0024	**
		0.2	0.3	0.6	1	1.1				2	p < 0.0001	***
		0.7	1	1	1.1	1.3				3	p < 0.0001	***
	NDN (10ng)	0	0	0	0.2	0.2				5	p < 0.0001	***
		0	0	0.1	0.3	0.4	aCSF vs. LV-1075 (100ng)			0,5	p > 0.05	ns
		0.1	0.1	0.1	0.3	0.7				1	p > 0.05	ns
		0	0.2	0.4	0.5	0.5				2	p > 0.05	ns
		0.1	0.2	0.2	0.4	0.4				3	p > 0.05	ns
		0	0	0	0.5	0.5				5	p > 0.05	ns
	LV-1075 (100ng)	0.2	0.3	0.7	1.4	1.8	aCSF vs. NDN (10ng) + LV-1075 (100ng)			0,5	p > 0.05	ns
		0.1	0.2	0.4	0.8	1.8				1	p > 0.05	ns
		0.2	0.4	0.7	0.8	1				2	p > 0.05	ns
		0.6	0.6	0.7	0.9	1.2				3	p > 0.05	ns
		0.4	0.5	0.7	0.8	1.2				5	p > 0.05	ns
		0.7	0.7	0.9	1.1	1.3
	NDN (10ng) + LV-1075 (100ng)	0.2	0.3	0.5	1.3	1.7
		0.5	0.8	0.8	1.1	1.2
		0.3	0.3	0.6	0.8	1.3
		0.2	0.4	0.6	1	1.2
		0.7	0.8	1.2	1.4	1.6
		0.3	0.4	0.6	0.9	1.1
