# Supplementary material for: Involvement of the Acyl-CoA binding domain containing 7 in the control of food intake and energy expenditure in mice
Source: eLife journal article supplement (doi:10.7554/elife.11742), 2016-02-15
Supplement: supp [file elife-11742-supp-v1.zip › elife_poa_e11742_Figure_4_source_data_1.xlsx]

## Sheet: Feuil1
		aCSF	NDN (100ng)
	Pomc mRNA levels	1.07189	2.09889
		1.19405	0.530923
		0.877363	1.8358
		1.17978	1.60035
		0.906157	1.61427
		0.882702	1.21007
		0.888055
		aCSF	NDN (100ng)
	Agrp mRNA levels	1.73	0.58
		0.73	0.95
		0.82	1.44
		1.09	0.86
		1.03	0.76
		0.89	0.49
		0.71
		aCSF	NDN (100ng)
	Npy mRNA levels	1.42	0.93
		1.47	0.9
		0.96	0.87
		0.76	1.66
		0.73	0.87
		1	1.046
		0.66
	Unpaired Student's t test
	Pomc mRNA levels		p < 0.05	*
	Agrp mRNA levels		p > 0.05	n.s.
	Npy mRNA levels		p > 0.05	n.s.
