# Supplementary material for: Involvement of the Acyl-CoA binding domain containing 7 in the control of food intake and energy expenditure in mice
Source: eLife journal article supplement (doi:10.7554/elife.11742), 2016-02-15
Supplement: supp [file elife-11742-supp-v1.zip › elife_poa_e11742_Figure_4_source_data_2.xlsx]

## Sheet: Feuil1
		Time	0.5	1	2	3	5
		aCSF	0,2	0,4	0,7	0,8	1,2
			0,4	0,4	0,5	0,8	1,1
			0,3	0,5	0,7	1,0	1,4
			0,4	0,6	0,8	0,8	1,0
			0,1	0,6	0,9	1,1	1,8
		NDN (10ng)	0,2	0,2	0,3	0,3	0,6
			0,1	0,2	0,2	0,3	0,3
			0,1	0,1	0,2	0,3	0,5
			0,2	0,2	0,3	0,4	0,4
			0,1	0,2	0,2	0,3	0,3
			0,1	0,1	0,3	0,5	0,6
		HS024 (100ng)	0,6	0,6	0,7	0,9	1,5
			0,4	0,5	0,8	1,0	1,5
			0,3	0,3	0,4	0,7	0,9
			0,3	0,4	0,5	0,7	0,9
			0,4	0,5	0,6	0,8	1,4
			0,3	0,4	0,6	0,8	1,2
		NDN (10ng) + HS024 (100ng)	0,5	0,5	0,6	0,9	0,9
			0,4	0,5	0,6	0,9	1,3
			0,3	0,4	0,5	0,6	1,2
			0,4	0,5	0,5	0,6	0,7
			0,4	0,4	0,4	0,5	0,9
			0,2	0,3	0,4	0,6	1,0
		2 way ANOVA analysis followed by Bonferroni posttests
				Time (h)	P value	Summary
		aCSF vs. NDN (10ng)		0,5	P > 0.05	ns
				1	P < 0.01	**
				2	P < 0.001	***
				3	P < 0.001	***
				5	P < 0.001	***
		aCSF vs. HS024 (100ng)		0,5	P > 0.05	ns
				1	P > 0.05	ns
				2	P > 0.05	ns
				3	P > 0.05	ns
				5	P > 0.05	ns
		aCSF vs. NDN (10ng) + HS024 (100ng)		0,5	P > 0.05	ns
				1	P > 0.05	ns
				2	P > 0.05	ns
				3	P > 0.05	ns
				5	P > 0.05	ns
