# Supplementary material for: Involvement of the Acyl-CoA binding domain containing 7 in the control of food intake and energy expenditure in mice
Source: eLife journal article supplement (doi:10.7554/elife.11742), 2016-02-15
Supplement: supp [file elife-11742-supp-v1.zip › elife_poa_e11742_Figure_4_source_data_3.xlsx]

## Sheet: Feuil1
	Time (h)	0,5	1,0	2,0	3,0	5,0
	aCSF / Mc4r+/+	0,5	0,6	0,7	1,0	1,6
		0,6	0,9	1,1	1,4	1,7
		0,3	0,5	0,7	0,9	1,0
		0,5	0,7	0,8	1,1	2,2
		0,9	1,2	1,5	2,0	2,2
		0,4	0,5	0,8	1,0	1,4
	NDN (10ng) / Mc4r+/+	0,1	0,2	0,3	0,5	0,8
		0,0	0,1	0,1	0,1	0,2
		0,0	0,1	0,1	0,1	0,4
		0,1	0,1	0,2	0,3	0,5
		0,2	0,2	0,2	0,2	0,4
		0,2	0,2	0,6	0,6	0,8
	aCSF / Mc4r-/-	0,5	0,8	0,9	1,1	1,2
		0,6	0,6	0,9	0,9	1,1
		0,7	0,9	0,9	1,3	1,3
		0,5	0,8	1,0	1,4	1,7
		0,5	0,8	0,9	1,3	1,9
		0,5	0,7	0,7	0,9	1,1
	NDN (10ng) / Mc4r-/-	0,5	0,8	1,0	1,1	1,1
		0,8	1,1	1,1	1,1	1,1
		0,7	0,9	1,0	1,4	1,6
		0,6	0,6	0,9	1,1	1,4
		0,7	0,7	0,8	1,3	1,6
		0,5	0,5	0,8	0,9	1,0
	2 way ANOVA analysis folowed by Bonferroni posttests
			Time (h)	P value	Summary
aCSF / Mc4r+/+ vs. NDN (10ng) / Mc4r+/+			0,5	P < 0.01	*
			1	P < 0.001	***
			2	P < 0.001	***
			3	P < 0.001	***
			5	P < 0.001	***
aCSF / Mc4r+/+ vs. aCSF / Mc4r-/-			0,5	P > 0.05	ns
			1	P > 0.05	ns
			2	P > 0.05	ns
			3	P > 0.05	ns
			5	P > 0.05	ns
aCSF / Mc4r+/+ vs. NDN (10ng) / Mc4r-/-			0,5	P > 0.05	ns
			1	P > 0.05	ns
			2	P > 0.05	ns
			3	P > 0.05	ns
			5	P > 0.05	ns
