# Supplementary material for: Involvement of the Acyl-CoA binding domain containing 7 in the control of food intake and energy expenditure in mice
Source: eLife journal article supplement (doi:10.7554/elife.11742), 2016-02-15
Supplement: supp [file elife-11742-supp-v1.zip › elife_poa_e11742_Figure_4_source_data_4.xlsx]

## Sheet: Feuil1
		aSCF	NDN (2µg/mL)
	α-MSH released (% of control)	1.00496	1.28463
		1.18102	1.49821
		0.937075	1.86004
		0.612872	1.64617
		1.26407	1.47431
	Student's t test
	p value	Summary
	p=0.0079	**
