# Supplementary material for: Involvement of the Acyl-CoA binding domain containing 7 in the control of food intake and energy expenditure in mice
Source: eLife journal article supplement (doi:10.7554/elife.11742), 2016-02-15
Supplement: supp [file elife-11742-supp-v1.zip › elife_poa_e11742_Figure_4_source_data_5.xlsx]

## Sheet: Feuil1
		Time (h)	0.5	1	2	3	5
		aCSF	0.6	0.9	1.1	1.6	1.8		2-way ANOVA analysis followed by Bonferroni posttests
			0.7	0.9	1.5	1.7	1.8
			0.3	0.7	1	1.4	1.6				Time (h)	P value	Summary
			0.6	0.8	0.9	1	1.2		aSCF vs. NDN (1ng)		0,5	p=0.0257	*
			0.4	0.5	0.8	1	1.2				1	p=0.001	**
		NDN (1ng)	0	0	0	0	0.2				2	P<0.0001	***
			0.1	0.1	0.4	0.4	0.5				3	P<0.0001	***
			0.1	0.2	0.4	0.6	0.8				5	P<0.0001	***
			0.1	0.3	0.4	0.6	0.6
			0.2	0.3	0.4	0.6	0.7
