# Supplementary material for: Involvement of the Acyl-CoA binding domain containing 7 in the control of food intake and energy expenditure in mice
Source: eLife journal article supplement (doi:10.7554/elife.11742), 2016-02-15
Supplement: supp [file elife-11742-supp-v1.zip › elife_poa_e11742_Figure_5_source_data_1.xlsx]

## Sheet: Feuil1
		aCSF	Leptin
	Relative ACBD7 protein level	1.31044	4.49148
		0.493039	3.12605
		1.41559	3.51639
		0.780928	3.69077
	Unpaired Student's t test
	p value	Summary
	p = 0.0003	***
