# Supplementary material for: Involvement of the Acyl-CoA binding domain containing 7 in the control of food intake and energy expenditure in mice
Source: eLife journal article supplement (doi:10.7554/elife.11742), 2016-02-15
Supplement: supp [file elife-11742-supp-v1.zip › elife_poa_e11742_Figure_5_source_data_2.xlsx]

## Sheet: Feuil1
		aCSF	Leptin (2µg)
	Relative NDN peptide level	0.902439	1.52033
		1.06504	1.20325
		1.03252	1.62602
	Unpaired Student's t test
	p value	Summary
	p = 0.0316	*
