# Supplementary material for: Involvement of the Acyl-CoA binding domain containing 7 in the control of food intake and energy expenditure in mice
Source: eLife journal article supplement (doi:10.7554/elife.11742), 2016-02-15
Supplement: supp [file elife-11742-supp-v1.zip › elife_poa_e11742_Figure_5_source_data_3.xlsx]

## Sheet: Feuil1
		FI
	aCSF	125	125	100	100	100	83.3
	leptin	0	33.3	16.7	25	37.5	0
	HS024	125	200	125	80	57.1	83.3
	HS024 + leptin	80	85.7	100	75	125	100
	LV1075 + HS024	120	80	116.7	125	125	100
	Leptin + HS024 + LV1075	75	125	80	80	80	100
	LV1075	125	100	116.7	150	83.3	100
	Leptin + LV1075	75	83.3	60	50	40	50
	1-way ANOVA analysis followed by Bonferroni posttests
			P value	Summary
	aCSF vs. leptin		P< 0,0001	***
	aCSF vs. HS024		P> 0,9999	ns
	aCSF vs. HS024 + leptin		P> 0,9999	ns
	aCSF vs. LV1075 + HS024		P> 0,9999	ns
	aCSF vs. Leptin + HS024 + LV1075		P> 0,9999	ns
	aCSF vs. LV1075		P> 0,9999	ns
	aCSF vs. Leptin + LV1075		P=0.0195	*
	leptin vs. aCSF		P< 0,0001	***
	leptin vs. HS024		P< 0,0001	***
	leptin vs. HS024 + leptin		P< 0,0001	***
	leptin vs. LV1075 + HS024		P< 0,0001	***
	leptin vs. Leptin + HS024 + LV1075		P< 0,0001	***
	leptin vs. LV1075		P< 0,0001	***
	leptin vs. Leptin + LV1075		P=0.0482	*
