# Supplementary material for: Involvement of the Acyl-CoA binding domain containing 7 in the control of food intake and energy expenditure in mice
Source: eLife journal article supplement (doi:10.7554/elife.11742), 2016-02-15
Supplement: supp [file elife-11742-supp-v1.zip › elife_poa_e11742_Figure_5_source_data_4.xlsx]

## Sheet: Feuil1
	time (h)	1	2	3	4	5		2-way ANOVA analysis followed by Bonferroni posttests
	aCSF	2.9	5.9	8.1	10.9	13
		3.2	4	4.6	5	8.2					Days	P value	Summary
		3.6	4	4	6.9	9.6		aSCF vs. NDN (100 ng/day)			1	P=0.2989	ns
		3.2	4.8	5.9	7.5	9.8					2	P=0.0395	*
		2.1	4.9	5.3	8.6	11.7					3	P=0.4714	ns
		1.5	4.7	7.9	11.7	15					4	p=0.9361	ns
	NDN	0.7	2.2	4.8	7.2	10.4					5	p=0.5090	ns
		2.9	3.9	7	10.5	12.9
		3.7	3.8	7.1	9.8	12.4		aSCF vs. LV-1075 (1 µg/day)			1	P=0.4353	ns
		1.7	3.6	6.1	9.2	13.5					2	p=0.0497	*
		2.1	2.6	4.5	8	12					3	p=0.0006	***
		0.2	1.8	2.7	6.3	9.4					4	p<0.0001	***
	LV-1075	2.3	5.5	8.1	11.5	14.8					5	p<0.0001	***
		2.3	5.9	9.6	12.4	16.5
		3	5.4	7.6	10.5	13.9
		2.7	5.8	8.6	12	14.8
		4.1	6.8	8.8	12	14.3
		6	8.8	10.9	14.8	18.4
