# Supplementary material for: Involvement of the Acyl-CoA binding domain containing 7 in the control of food intake and energy expenditure in mice
Source: eLife journal article supplement (doi:10.7554/elife.11742), 2016-02-15
Supplement: supp [file elife-11742-supp-v1.zip › elife_poa_e11742_Figure_5_source_data_5.xlsx]

## Sheet: Feuil1
	time (h)	1	2	3	4	5		2-way ANOVA analysis followed by Bonferroni posttests
	aCSF	0.13	0.32	0.83	0.93	0.57
		0.53	-1.38	-0.77	-0.77	-1.03					Days	P value	Summary
		0.13	-0.58	-0.07	0.33	1.07		aSCF vs. NDN (100 ng/day)			1	P=0.1704	ns
		0.83	0.62	0.03	-1.57	-1.23					2	P=0.0122	*
		-0.47	0.42	-0.57	-0.37	-0.73					3	P=0.0247	*
		-1.17	0.62	0.53	1.43	1.37					4	p=0.0166	*
	NDN	-2.57	-1.88	-2.27	-1.77	-1.93					5	p=0.0247	*
		0.33	-0.78	-0.27	-0.87	-0.43
		0.93	-0.18	-0.47	-0.37	-0.93		aSCF vs. LV-1075 (1 µg/day)			1	P>0.9999	ns
		-1.17	-1.38	-0.37	-2.07	-1.23					2	p=0.0203	*
		-0.87	-2.38	-1.67	-1.87	-1.833					3	p=0.0479	*
		-2.17	-1.78	-2.67	-1.17	-1.33					4	p=0.0166	*
	LV-1075	-0.37	1.02	0.43	1.53	1.87					5	p=0.0008	***
		-0.07	1.92	2.23	1.73	2.47
		0.23	0.92	0.43	-0.27	0.57
		0.23	1.32	1.23	1.23	0.77
		0.73	0.92	0.53	1.03	1.37
		1.33	1.82	2.13	2.83	3.77
