# Supplementary figures and images for: Involvement of the Acyl-CoA binding domain containing 7 in the control of food intake and energy expenditure in mice
Source: eLife journal article supplement (doi:10.7554/elife.11742), 2016-02-15

Figure 1 – Figure supplement 1

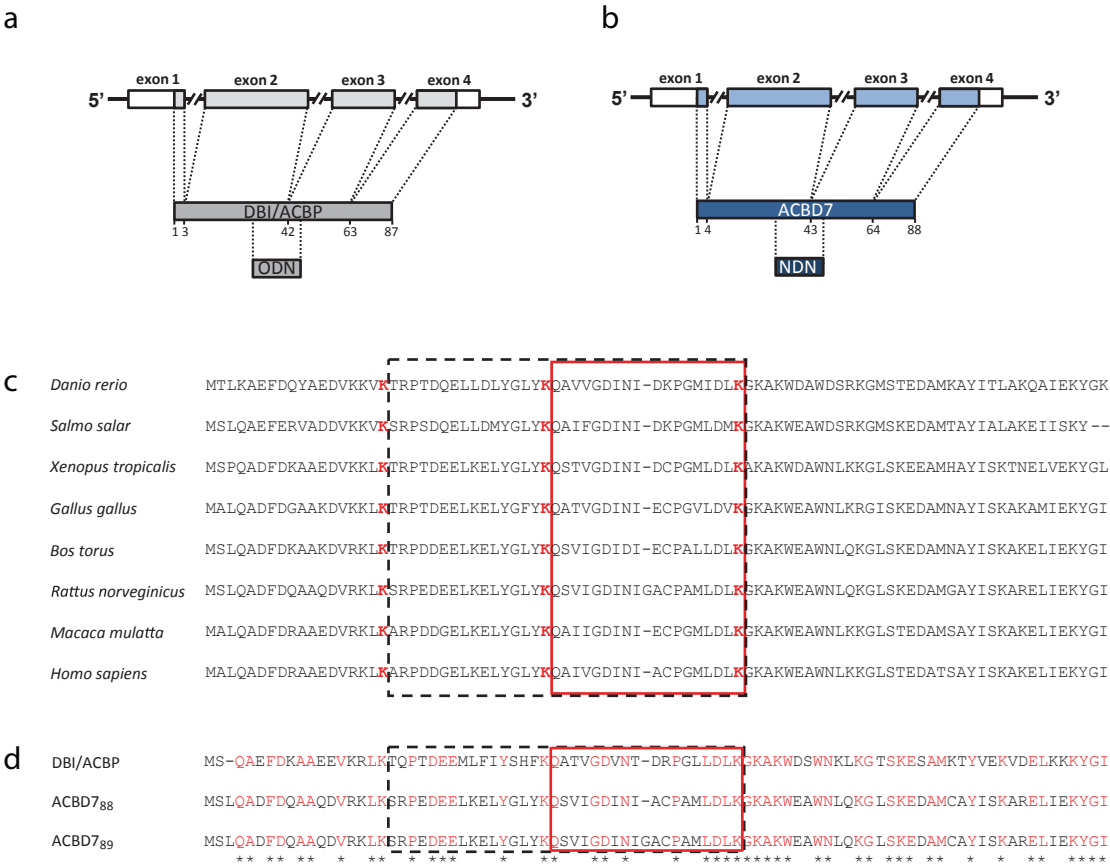

Supplement: supp [file elife-11742-supp-v1.zip › elife_poa_e11742_Figure_1_figure_supplement_1.pdf]

Figure 1 – Figure supplement 3

A

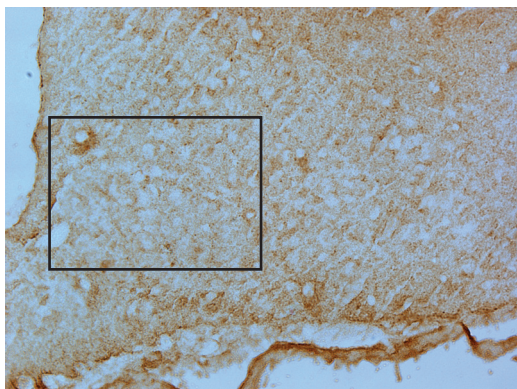

B

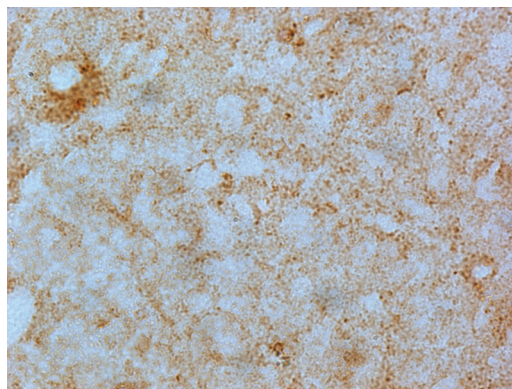

Supplement: supp [file elife-11742-supp-v1.zip › elife_poa_e11742_Figure_1_figure_supplement_3.pdf]
